# Supplementary material for: Quantification of Defensive Proteins in Skin Mucus of Atlantic salmon Using Minimally Invasive Sampling and High-Sensitivity ELISA
Source: MDPI journal article supplement (doi:10.3390/ani10081374), 2020-08-07
Supplement: s1 [file s1]

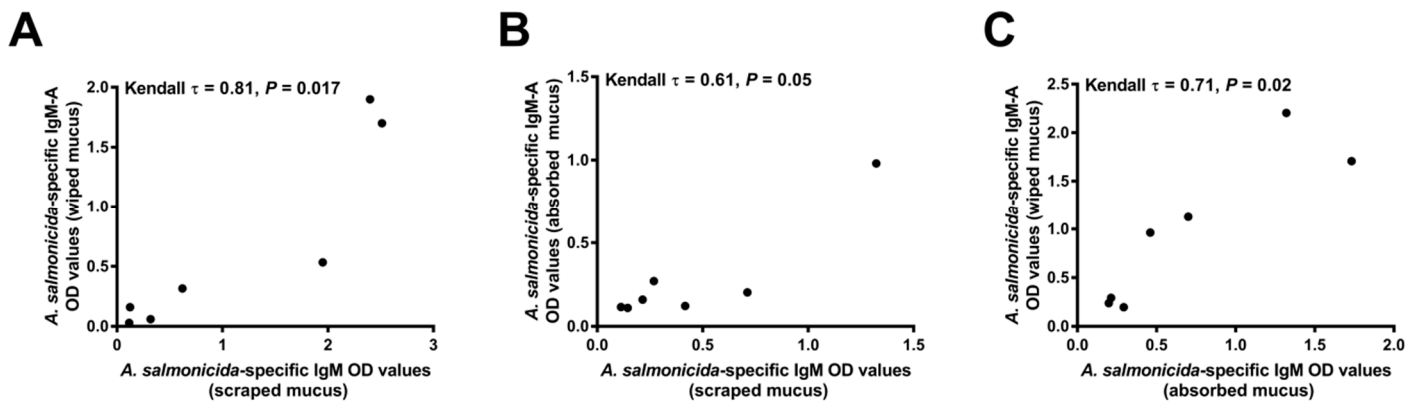

**Supplementary Figure 1.** Scatter plots, including Kendall's rank correlation analyses of *A. salmonicida*-specific IgM-A OD values between skin mucus samples collected by absorption, wiping and scraping, in a pairwise fashion from the same fish: (A) wiped versus scraped, (B) absorbed versus scraped, and (C) wiped versus absorbed. The Kendall  $\tau$  and  $P$  values are shown.

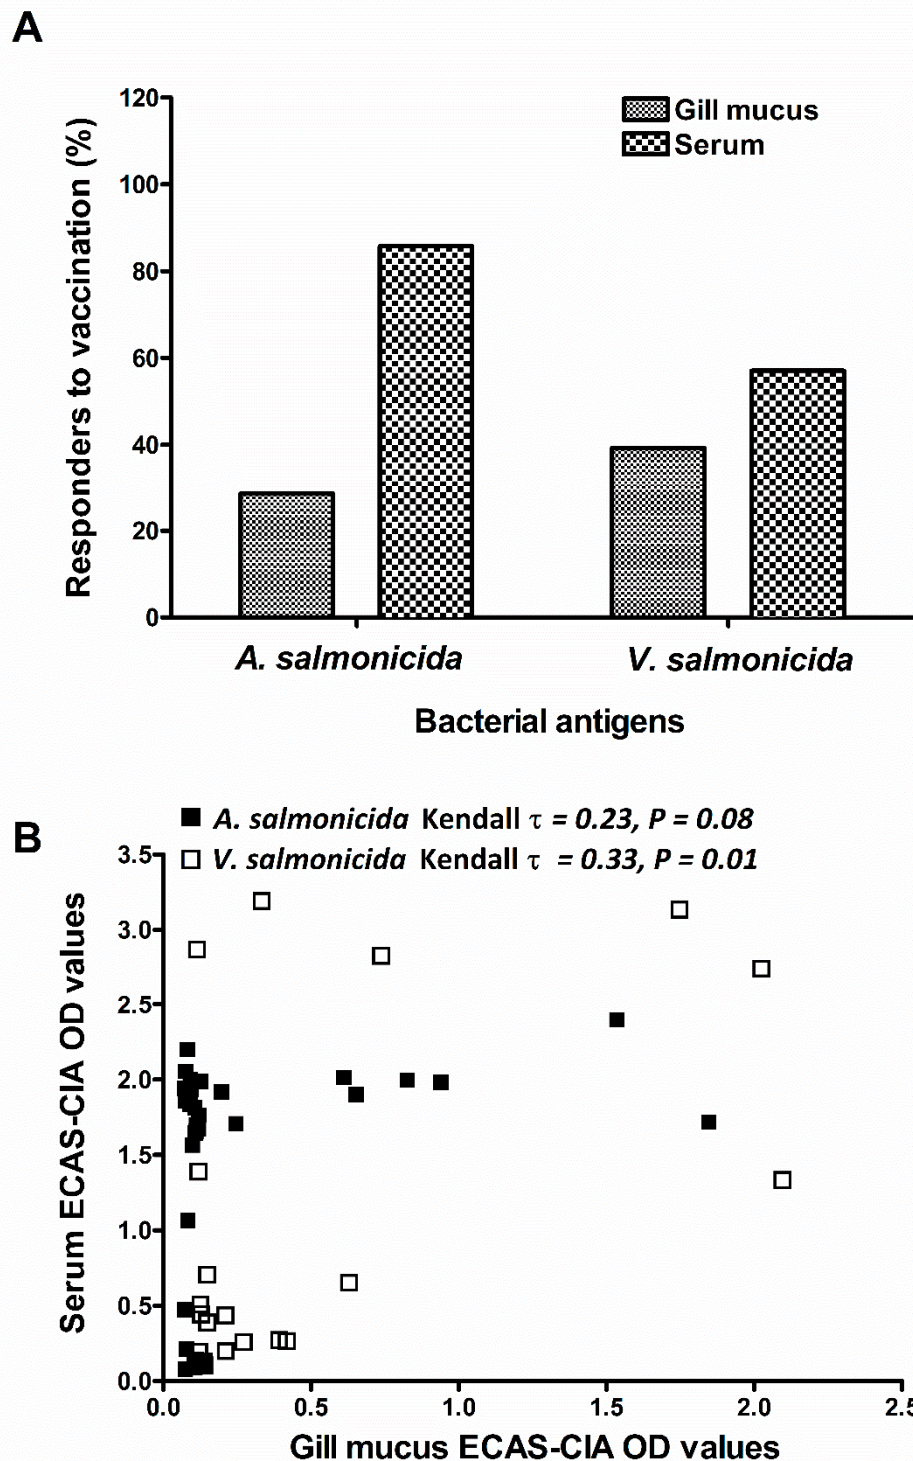

**Supplementary Figure 2.** Specific immune responses against ALPHA JECT vaccination in absorbed gill mucus and serum, from Atlantic salmon. (A) Shows the percentage of responder fish to vaccination based on ECAS-CIA positive signals for antigen-specific IgM-A in absorbed gill mucus and serum (D2; n = 28) against both *A. salmonicida*- and *V. salmonicida*. (B) Shows Kendall's rank correlation analyses between the *A. salmonicida*- or *V. salmonicida*-specific IgM-A OD values (450 nm) in absorbed gill mucus samples, and the corresponding values in serum samples (D2; n = 28). The Kendall  $\tau$  and P values are shown.
